# Supplementary material for: Porous ZnCl2-Activated Carbon from Shaddock Peel: Methylene Blue Adsorption Behavior
Source: MDPI journal article supplement (doi:10.3390/ma15030895), 2022-01-25
Supplement: s1 [file s1]

Supplementary Information

# Porous ZnCl<sub>2</sub>-Activated Carbon from Shaddock Peel: Methylene Blue Adsorption Behavior

Hongxia Zhao <sup>1</sup>, Haihong Zhong <sup>1</sup>, Yu Jiang <sup>2</sup>, Huiyu Li <sup>1</sup>, Pinggui Tang <sup>1</sup>, Dianqing Li <sup>1</sup>, and Yongjun Feng <sup>1,\*</sup>

<sup>1</sup> State Key Laboratory of Chemical Resource Engineering, College of Chemistry, Beijing University of Chemical Technology, Beijing 100029, China.

<sup>2</sup> Beijing Municipal Construction Group Co. Ltd, A40 Xingshikou Road, Haidian District, Beijing, China, 100195.

\* Correspondence: yjfeng@mail.buct.edu.cn Fax: +86 10 6442 5385; Phone: +86 10 6443 6992

**Citation:** Zhao, H.; Zhong, H.; Jiang, Y.; Li, H.; Tang, P.; Li, D.; Feng, Y. Porous ZnCl<sub>2</sub>-Activated Carbon from Shaddock Peel: Methylene Blue Adsorption Behavior. *Materials* **2022**, *15*, 895. <https://doi.org/10.3390/ma15030895>

Academic Editor: Avelino Núñez-Delgado

Received: 8 December 2021

Accepted: 18 January 2022

Published: 25 January 2022

**Publisher's Note:** MDPI stays neutral with regard to jurisdictional claims in published maps and institutional affiliations.

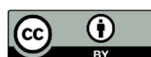

**Copyright:** © 2022 by the authors. Licensee MDPI, Basel, Switzerland. This article is an open access article distributed under the terms and conditions of the Creative Commons Attribution (CC BY) license (<https://creativecommons.org/licenses/by/4.0/>)

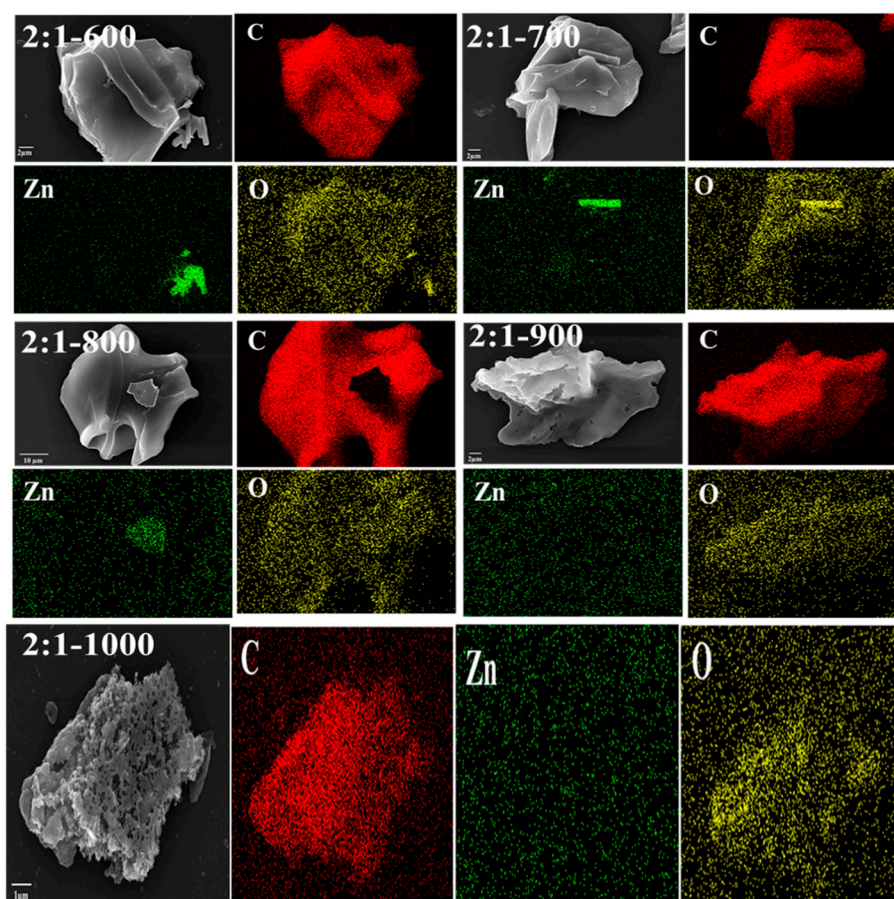

**Figure S1.** The EDXS mappings of 2:1-600, 2:1-700, 2:1-800, 2:1-900 and 2:1-1000.

**Table S1.** The element percentage of C, O, Zn in adsorbents prepared with different carbonization temperatures.

| Samples  | Element Percentage |       |        |
|----------|--------------------|-------|--------|
|          | C (%)              | O (%) | Zn (%) |
| 2:1-600  | 87.94              | 11.63 | 0.43   |
| 2:1-700  | 89.15              | 10.59 | 0.26   |
| 2:1-800  | 92.62              | 7.36  | 0.02   |
| 2:1-900  | 89.78              | 10.21 | 0.01   |
| 2:1-1000 | 72.74              | 27.26 | 0      |

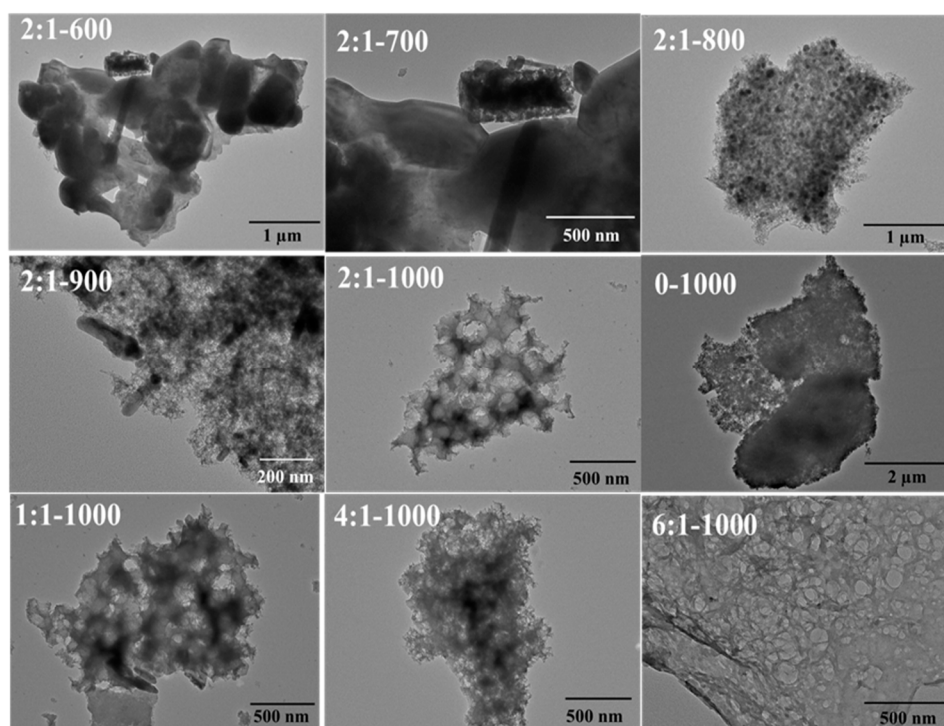**Figure S2.** The TEM images of AC adsorbents synthesized at various carbonization temperatures (from 600 to 1000 °C) and mass ratios (0, 1:1, 2:1, 4:1, 6:1).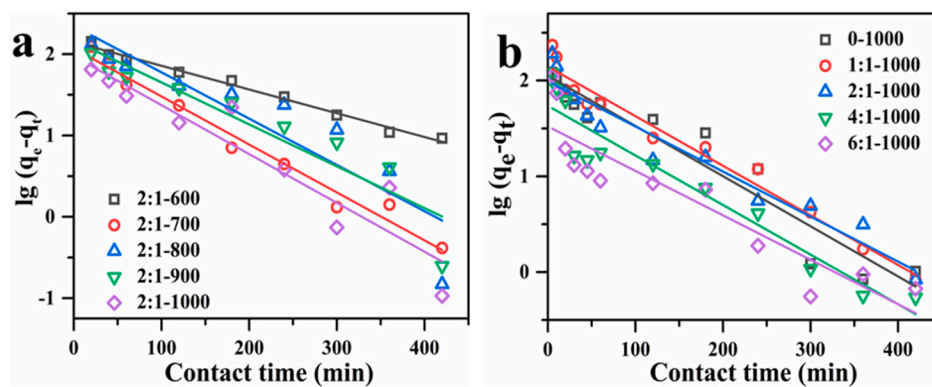**Figure S3.** The linear fitting of pseudo-first-order kinetics for MB by the AC adsorbents from (a) different carbonization temperatures and (b) mass ratios.

**Table S2.** Linear fitting parameters of the pseudo-first-order and pseudo-second-order adsorption kinetics of biomass carbon adsorbents with different carbonization temperatures for MB adsorption.

| Sam-<br>ples | $q_{e, \text{exp}}$ (mg/g) | Pseudo-First-Order            |          |        | Pseudo-Second-Order           |          |        |
|--------------|----------------------------|-------------------------------|----------|--------|-------------------------------|----------|--------|
|              |                            | $q_{e, \text{cal}}$<br>(mg/g) | $k_1$    | $R^2$  | $q_{e, \text{cal}}$<br>(mg/g) | $k_2$    | $R^2$  |
| 2:1-600      | 324                        | 140.99                        | 0.006725 | 0.9868 | 337.84                        | 0.000131 | 0.9981 |
| 2:1-700      | 366                        | 117.44                        | 0.01359  | 0.9747 | 375.94                        | 0.00025  | 0.9999 |
| 2:1-800      | 417                        | 221.60                        | 0.01310  | 0.8046 | 427.35                        | 0.000163 | 0.9992 |
| 2:1-900      | 617                        | 147.02                        | 0.01186  | 0.8552 | 625.00                        | 0.000242 | 0.9998 |
| 2:1-1000     | 879                        | 94.09                         | 0.01384  | 0.8667 | 862.07                        | 0.000424 | 0.9999 |

**Table S3.** Linear fitting parameters of the pseudo-first-order and pseudo-second-order adsorption kinetics of the AC adsorbents with different mass ratios for MB adsorption.

| Sam-<br>ples | $q_{e, \text{exp}}$ (mg/g) | Pseudo-First-Order            |         |        | Pseudo-Second-Order           |          |        |
|--------------|----------------------------|-------------------------------|---------|--------|-------------------------------|----------|--------|
|              |                            | $q_{e, \text{cal}}$<br>(mg/g) | $k_1$   | $R^2$  | $Q_{e, \text{cal}}$<br>(mg/g) | $k_2$    | $R^2$  |
| 0-1000       | 704                        | 111.94                        | 0.01207 | 0.9157 | 709.22                        | 0.000385 | 0.9997 |
| 1:1-1000     | 771                        | 139.86                        | 0.01193 | 0.9662 | 775.19                        | 0.000346 | 0.9999 |
| 2:1-1000     | 879                        | 94.09                         | 0.01384 | 0.8667 | 862.07                        | 0.000424 | 0.9999 |
| 4:1-1000     | 822                        | 54.45                         | 0.01193 | 0.8787 | 819.67                        | 0.00093  | 0.9999 |
| 6:1-1000     | 803                        | 33.18                         | 0.01069 | 0.8261 | 806.45                        | 0.001437 | 0.9999 |

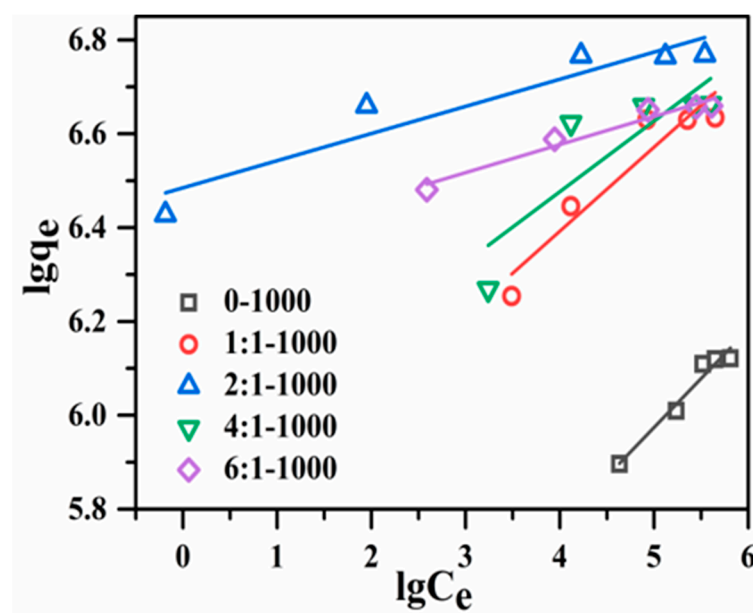**Figure S4.** The linear fitting adsorption isotherm of Freundlich adsorption isotherm for the AC adsorbents prepared with different mass ratios.

**Table S4.** Linear fitting parameters of Langmuir and Freundlich adsorption isotherms of the AC adsorbents with different mass ratios for MB adsorption.

| Samples  | Langmuir Isotherm |              |        | Freundlich Isotherm |         |        |
|----------|-------------------|--------------|--------|---------------------|---------|--------|
|          | $q_m$ (mg/g)      | $K_L$ (L/mg) | $R^2$  | $K_F$ (mg/g)        | $n$     | $R^2$  |
| 0-1000   | 523.56            | 0.02122      | 0.9902 | 85137.32            | 4.7897  | 0.9477 |
| 1:1-1000 | 813               | 0.06241      | 0.9902 | 474307.5            | 5.5831  | 0.8662 |
| 2:1-1000 | 869.57            | 1.8880       | 0.9999 | 3054007             | 17.2951 | 0.8611 |
| 4:1-1000 | 813.01            | 0.1132       | 0.9946 | 748876.2            | 6.6428  | 0.6465 |
| 6:1-1000 | 787.40            | 0.2906       | 0.9995 | 2176256             | 16.7112 | 0.9479 |
